# Supplementary material for: 3D spongy nanofiber structure Fe–NC catalysts built by a graphene regulated electrospinning method
Source: Royal Society of Chemistry journal article supplement (doi:10.1039/d0cc01517b), 2020-01-01
Supplement: d0cc01517b5.pdf [file d0cc01517b5.pdf]

COMMUNICATION

## Supporting Information

Received 00th January 20xx,  
Accepted 00th January 20xx

DOI: 10.1039/x0xx00000x

### 3D spongy nanofiber structure Fe-NC catalysts built by graphene regulated electro-spinning method

Weiyuan Ding,<sup>a</sup> Hongquan Yu,<sup>a</sup> Yu Tang,<sup>a</sup> Zhuxin Li,<sup>a</sup> Bijiao Liu,<sup>a</sup> Dechong Liu,<sup>a</sup> Yuyu Wang,<sup>a</sup> Shuhong Liu,<sup>a</sup> Hong Zhao,<sup>\*a</sup> and Daniel Mandler<sup>\*b</sup>

Experimental characterization: The morphology of the samples was studied by scanning electron microscope (SEM, FE-JSM-6701F, JEOL, Japan), Elemental mapping and high resolution of the samples were characterized by transmission electron microscopy (TEM, JSM-2100, JEOL, Japan). The crystal phase structure of the electrocatalyst was obtained by X-ray diffraction analysis (XRD, D / max-2500, Rigaku, Japan) using CuK $\alpha$  radiation ( $\lambda = 1.54056\text{\AA}$ ) source radiation. The nitrogen adsorption-desorption measurement data of the catalyst were performed on the Quantachrome AUTOSORB-SI instrument, and the data were used to calculate the specific surface area and pore size distribution according to the Brunauer-Emmett-Teller (BET) and t-Plot methods respectively. X-ray photoelectron spectroscopy (XPS) measurement of elements on an X-ray photoelectron spectrometer (XPS, ESCALAB 250, Thermo Fisher Scientific, USA) Use the C 1s peak (284.8eV) as the calibration reference.

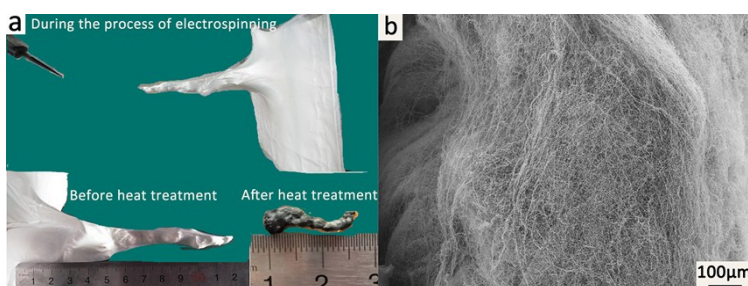

Fig S1. Spindle shape 3D SNS composite and the corresponding catalyst right after calcination at 800 °C (a) and the SEM image of the cross section of the catalyst (b) .

<sup>a</sup>. Key laboratory of new energy batteries of Liaoning province, Dalian Jiaotong University, Dalian, 116028, China, E-mail: Zhaohong@djtu.edu.cn

<sup>b</sup>. Institute of Chemistry Hebrew University, Jerusalem, 332, Lsrael, E-mail: daniel.mandler@mail.huji.ac.il

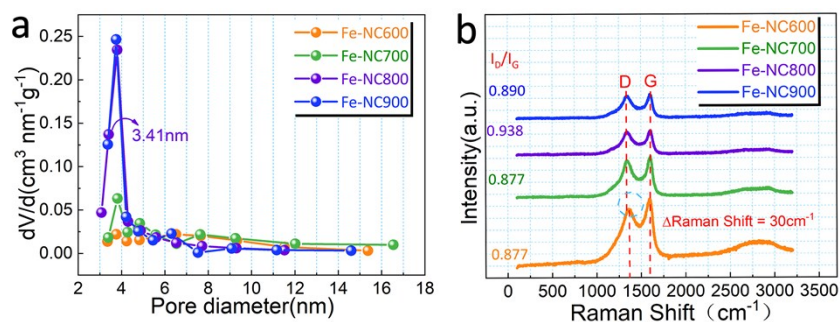

Table S1. The data generalized from nitrogen adsorption–desorption isotherms of different 3D SNS Fe-NC catalyst Fig S2. (a) pore size distribution of the 3D SNS catalysts and (b) Raman spectra.

| Catalysts | Specific Surface Area (m <sup>2</sup> /g) | Most probable distribution pore size (nm) | Total volume of pores smaller the 5nm(cm <sup>3</sup> ) |
|-----------|-------------------------------------------|-------------------------------------------|---------------------------------------------------------|
| Fe-NC600  | 297.1                                     | 3.76                                      | 0.0624cm <sup>3</sup>                                   |
| Fe-NC700  | 282.6                                     | 3.81                                      | 0.14045cm <sup>3</sup>                                  |
| Fe-NC800  | 487.5                                     | 3.80                                      | 0.48176cm <sup>3</sup>                                  |
| Fe-NC900  | 493.5                                     | 3.75                                      | 0.43984cm <sup>3</sup>                                  |

Table.S2 Atomic ratios illustrated by high resolution XPS characterizations

| Element        | Fe-NC600 | Fe-NC700 | Fe-NC800 | Fe-NC900 |
|----------------|----------|----------|----------|----------|
| C1s(Atomic %)  | 84.7     | 84.75    | 83.29    | 85.98    |
| Fe2p(Atomic %) | 1.81     | 2.29     | 3.08     | 2.58     |
| N1s(Atomic %)  | 6.77     | 3.95     | 3.26     | 3.86     |
| O1s(Atomic %)  | 6.72     | 9        | 10.15    | 7.25     |

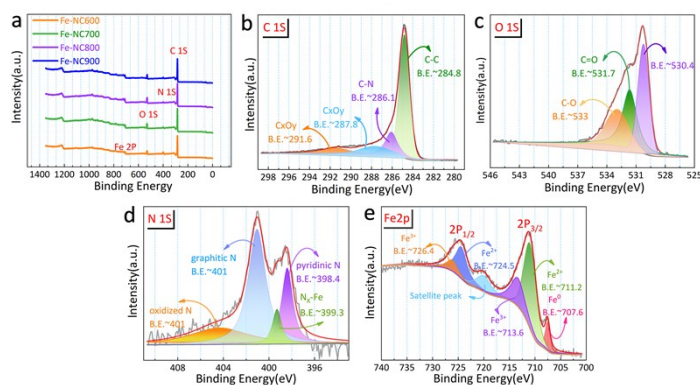

Fig S3. XPS survey spectra of Fe-NC 800 (a) and corresponding high resolution C 1s (b) and O 1s (c) and N 1s (d) and Fe 2p (e)

Table.S3 Active materials contained in 3D SNS Fe-NC catalysts and corresponding ORR performance

|           | Fe <sub>3</sub> C | Fe <sub>2</sub> N | Fe <sub>4</sub> N | Electron transfer(n) | E <sub>1/2</sub> (Vs.RHE) |
|-----------|-------------------|-------------------|-------------------|----------------------|---------------------------|
| Fe-NC 700 | √                 |                   | √                 | 3.9                  | 0.86V                     |
| Fe-NC 800 | √                 | √                 | √                 | 4                    | 0.88V                     |
| Fe-NC 900 |                   | √                 | √                 | 3.4                  | 0.86V                     |

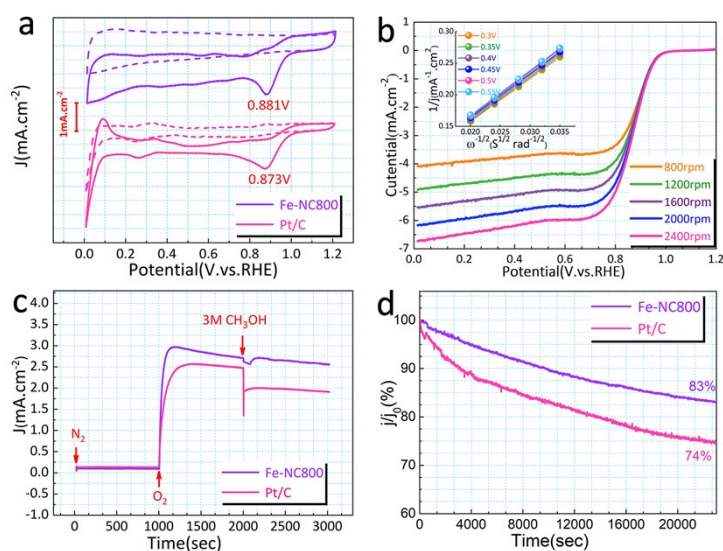

Fig S4. (a) Comparison of CV curves of Fe-NC800 and 20wt% commercial Pt/C in N<sub>2</sub> (dashed line) or O<sub>2</sub> (solid line) saturated 0.1M KOH electrolyte. (b) LSV curves at different rotating speed in O<sub>2</sub> saturated 0.1M KOH electrolyte and corresponding K-L plots of Fe-NC800. (c) Chronoamperometric response upon introduction of 3 M methanol after 1000 sec in O<sub>2</sub>-saturated 0.1 M KOH (d) Chronoamperometric response of Fe-NC800 and commercial Pt/C.
