# Supplementary figures and images for: 3D spongy nanofiber structure Fe–NC catalysts built by a graphene regulated electrospinning method
Source: Royal Society of Chemistry journal article supplement (doi:10.1039/d0cc01517b), 2020-01-01

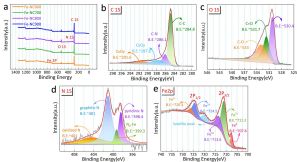

Supplement: d0cc01517b1.pdf [file d0cc01517b1.pdf]

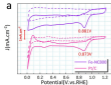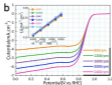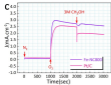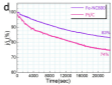

Supplement: d0cc01517b2.pdf [file d0cc01517b2.pdf]

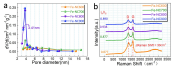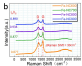

Supplement: d0cc01517b3.pdf [file d0cc01517b3.pdf]

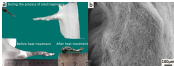

Supplement: d0cc01517b4.pdf [file d0cc01517b4.pdf]
